# Supplementary material for: Efficacy and safety of the oral Janus kinase inhibitor peficitinib (ASP015K) monotherapy in patients with moderate to severe rheumatoid arthritis in Japan: a 12-week, randomised, double-blind, placebo-controlled phase IIb study
Source: PubMed Central journal article supplement — Ann Rheum Dis. 2015 Dec 15;75(6):1057–64. doi: 10.1136/annrheumdis-2015-208279 (PMC4893099; doi:10.1136/annrheumdis-2015-208279), 2015-12-15
Supplement: annrheumdis-2015-208279-s1.pdf [file annrheumdis-2015-208279-s1.pdf]

# Supplementary figure S1 Patient disposition

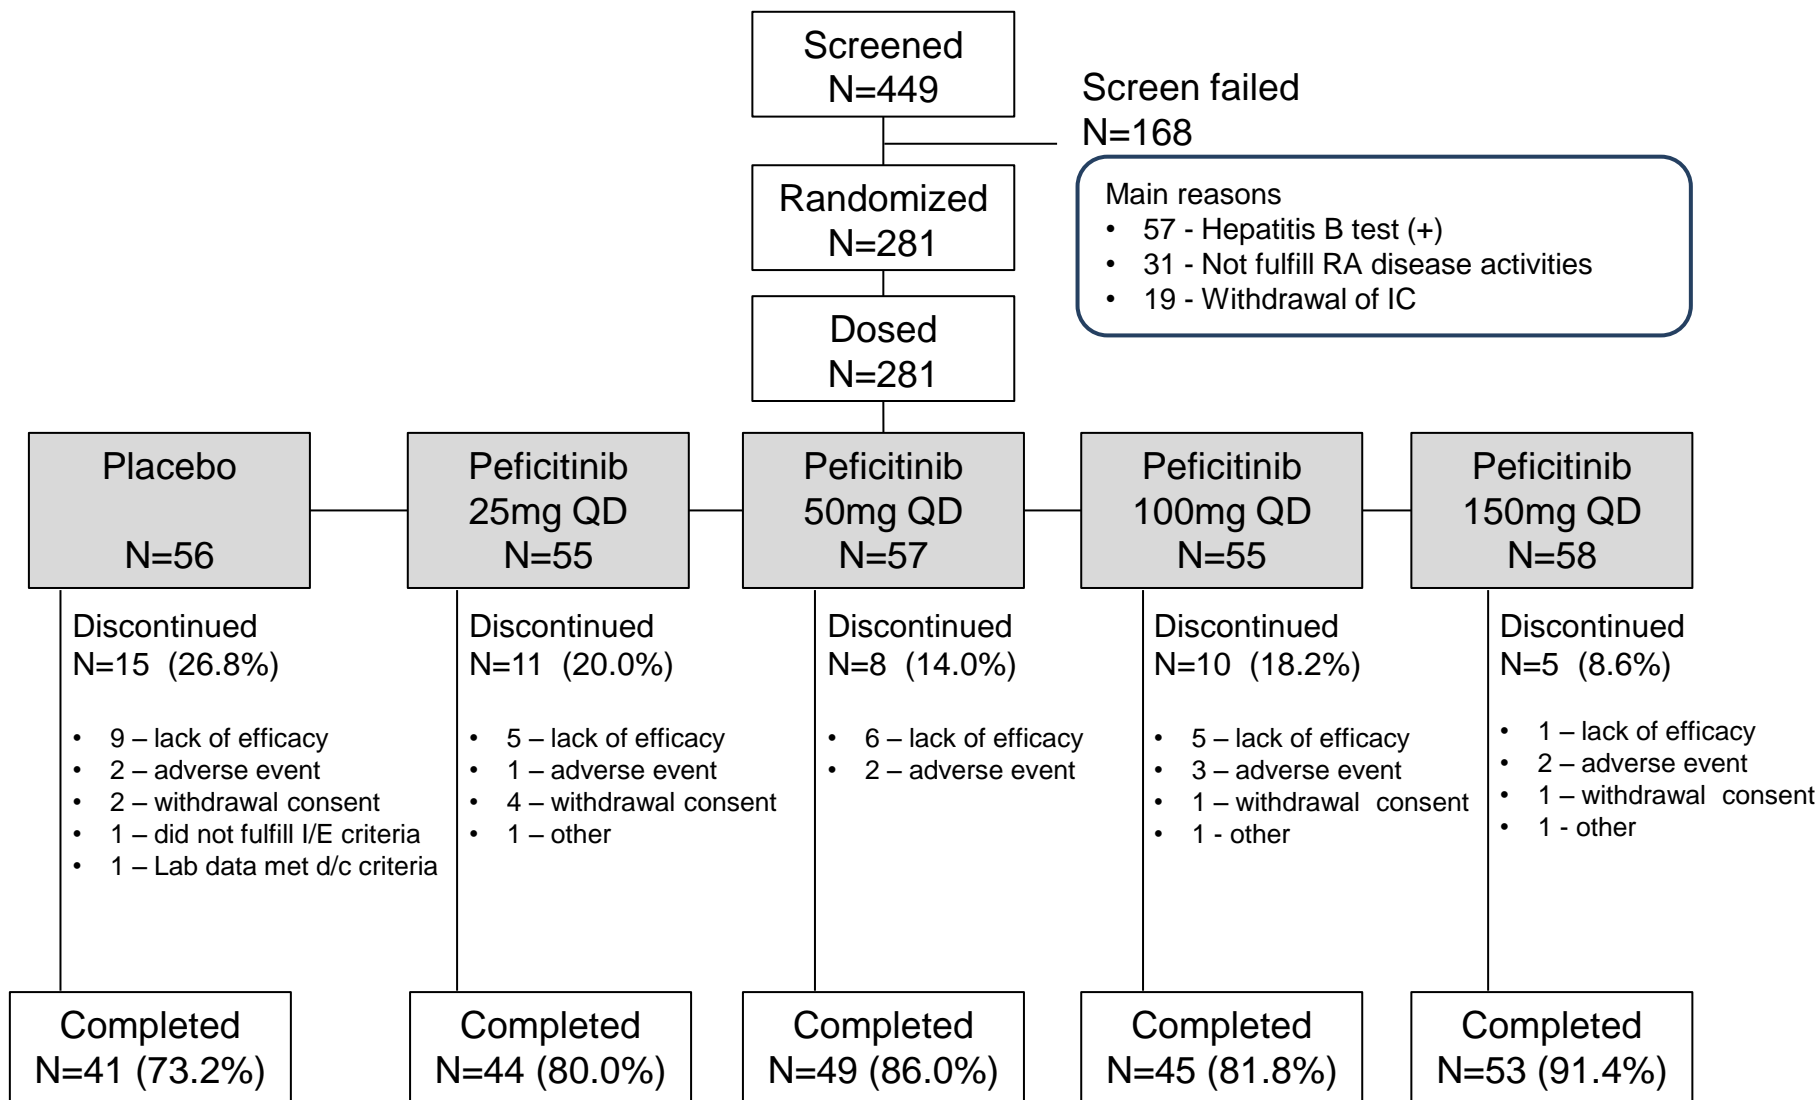

Primary reasons for discontinuation were indicated in the figure.

## Supplementary table S1 Serious adverse events

| Treatment            | Sex/Age   | Event                             | Relationship to study drug |
|----------------------|-----------|-----------------------------------|----------------------------|
| Placebo              | Female/71 | Atrial fibrillation               | Not related                |
|                      |           | Cardiac failure                   | Not related                |
|                      |           | Hepatic function abnormal         | Not related                |
| Peficitinib 25mg QD  | Female/42 | Abortion spontaneous              | Related                    |
| Peficitinib 50mg QD  | Female/60 | Death due to cerebral haemorrhage | Not related                |
|                      | Male/59   | Rheumatoid arthritis              | Not related                |
| Peficitinib 100mg QD | Male/67   | *Cholecystitis                    | Related                    |
|                      | Female/53 | Femoral neck fracture             | Not related                |
|                      |           | Femoral neck fracture             | Not related                |
|                      | Female/63 | Rheumatoid arthritis              | Not related                |

\*The event was categorized as hepatobiliary disorders (System Organ Class in MedDRA v11.1).

## Supplementary table S2 Treatment-emergent adverse events >5% in any group

| System Organ Class Preferred Term                      | Placebo (N=56)    | Peficitinib 25mg QD (N=55) | Peficitinib 50mg QD (N=57) | Peficitinib 100mg QD (N=55) | Peficitinib 150mg QD (N=58) |
|--------------------------------------------------------|-------------------|----------------------------|----------------------------|-----------------------------|-----------------------------|
| <b>Overall</b>                                         | <b>36 (64.3%)</b> | <b>39 (70.9%)</b>          | <b>37 (64.9%)</b>          | <b>29 (52.7%)</b>           | <b>39 (67.2%)</b>           |
| <b>Infections and infestations</b>                     | <b>12 (21.4%)</b> | <b>18 (32.7%)</b>          | <b>14 (24.6%)</b>          | <b>7 (12.7%)</b>            | <b>17 (29.3%)</b>           |
| Nasopharyngitis                                        | 3 (5.4%)          | 11 (20.0%)                 | 9 (15.8%)                  | 1 (1.8%)                    | 9 (15.5%)                   |
| Cystitis                                               | 3 (5.4%)          | 1 (1.8%)                   | 2 (3.5%)                   | 0 (0.0%)                    | 2 (3.4%)                    |
| <b>Gastrointestinal disorders</b>                      | <b>3 (5.4%)</b>   | <b>8 (14.5%)</b>           | <b>11 (19.3%)</b>          | <b>6 (10.9%)</b>            | <b>10 (17.2%)</b>           |
| Diarrhoea                                              | 1 (1.8%)          | 4 (7.3%)                   | 1 (1.8%)                   | 1 (1.8%)                    | 2 (3.4%)                    |
| Constipation                                           | 0 (0.0%)          | 1 (1.8%)                   | 1 (1.8%)                   | 3 (5.5%)                    | 0 (0.0%)                    |
| Dyspepsia                                              | 0 (0.0%)          | 0 (0.0%)                   | 0 (0.0%)                   | 0 (0.0%)                    | 3 (5.2%)                    |
| Stomatitis                                             | 1 (1.8%)          | 0 (0.0%)                   | 3 (5.3%)                   | 0 (0.0%)                    | 0 (0.0%)                    |
| <b>Musculoskeletal and connective tissue disorders</b> | <b>21 (37.5%)</b> | <b>12 (21.8%)</b>          | <b>12 (21.1%)</b>          | <b>6 (10.9%)</b>            | <b>5 (8.6%)</b>             |
| Rheumatoid arthritis                                   | 18 (32.1%)        | 12 (21.8%)                 | 8 (14.0%)                  | 4 (7.3%)                    | 4 (6.9%)                    |
| <b>Investigations</b>                                  | <b>2 (3.6%)</b>   | <b>7 (12.7%)</b>           | <b>1 (1.8%)</b>            | <b>6 (10.9%)</b>            | <b>13 (22.4%)</b>           |
| CPK increased                                          | 0 (0.0%)          | 2 (3.6%)                   | 1 (1.8%)                   | 1 (1.8%)                    | 7 (12.1%)                   |
| TG increased                                           | 0 (0.0%)          | 3 (5.5%)                   | 0 (0.0%)                   | 2 (3.6%)                    | 1 (1.7%)                    |
| Lipids increased                                       | 0 (0.0%)          | 0 (0.0%)                   | 0 (0.0%)                   | 0 (0.0%)                    | 3 (5.2%)                    |

## Supplementary figure S2

### Mean Change from Baseline in MMP-3 at Week12/Early termination

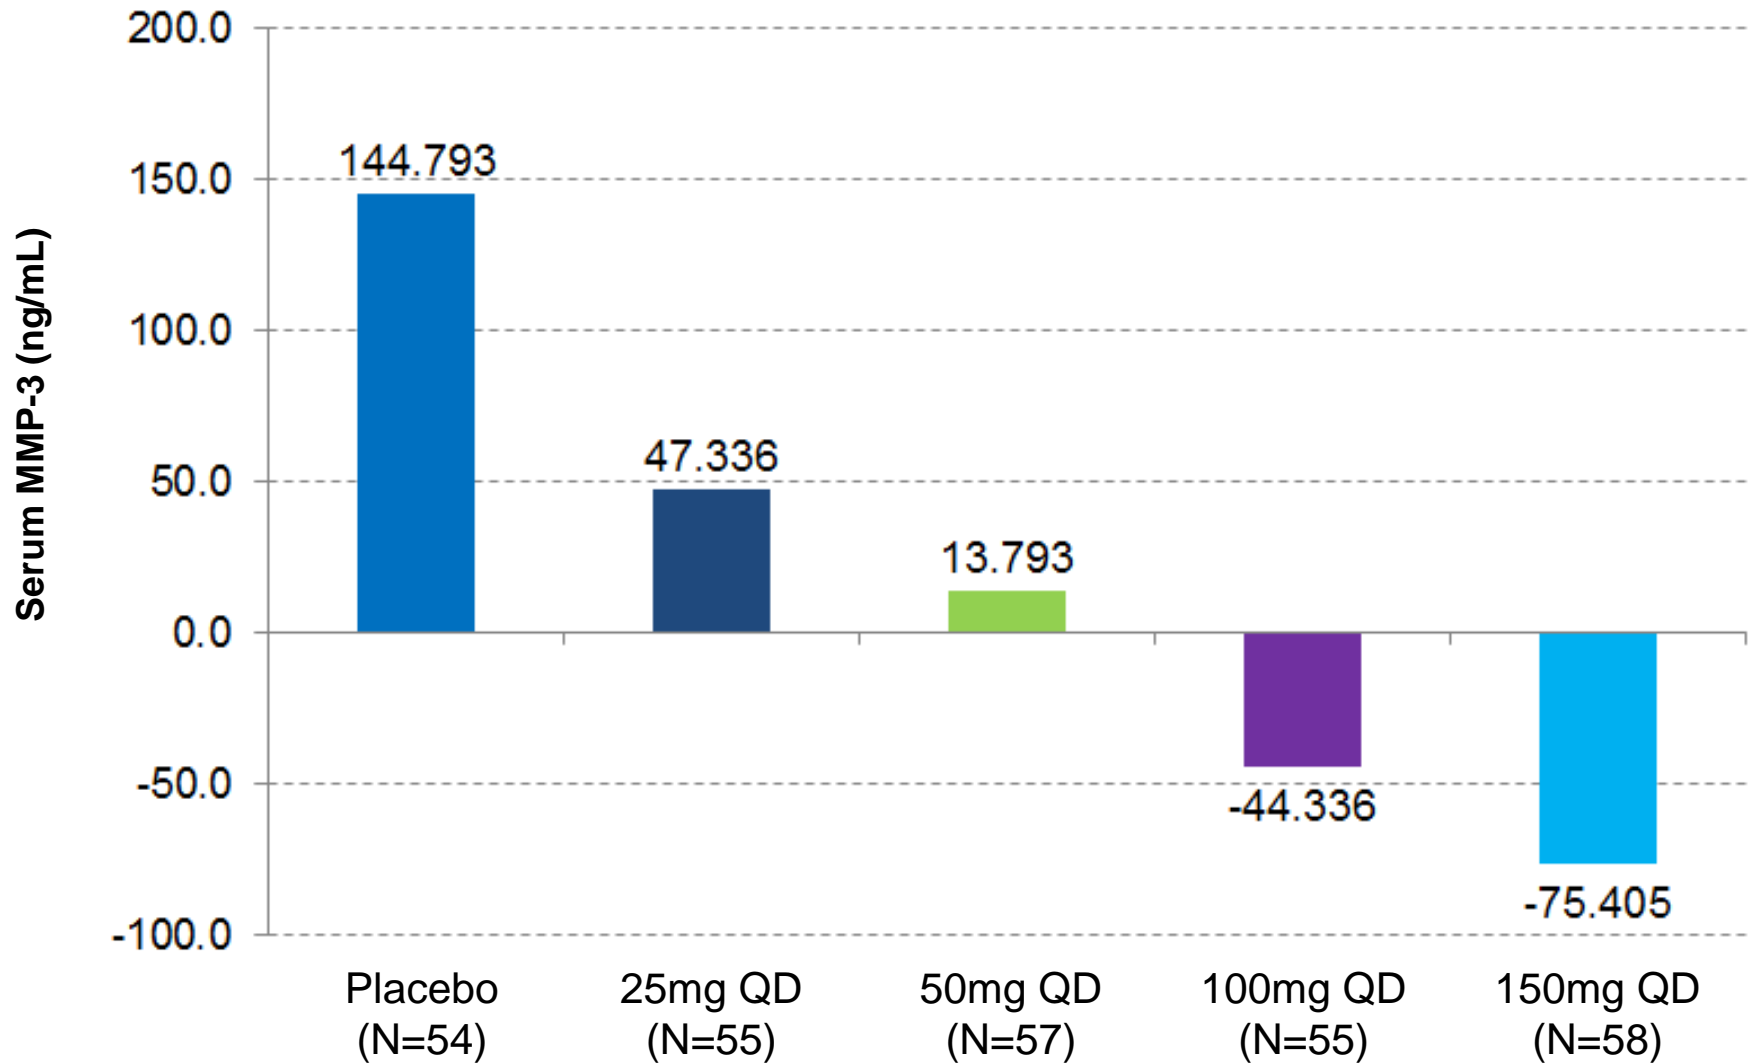

Statistical comparison wasn't performed.
